# Supplementary material for: 3D-Printed Poly(ε-Caprolactone)/Hydroxyapatite Scaffolds Modified with Alkaline Hydrolysis Enhance Osteogenesis In Vitro
Source: PubMed Central journal article supplement (PMC7830212; doi:10.3390/polym13020257), 2021-01-14
Supplement: polymers-13-00257-s001.pdf [file polymers-13-00257-s001.pdf]

Supplementary Materials

# 3D-Printed Poly( $\epsilon$ -caprolactone)/Hydroxyapatite Scaffolds Modified with Alkaline Hydrolysis Enhance Osteogenesis In Vitro

Sangbae Park <sup>1,†</sup>, Jae Eun Kim <sup>1,†</sup>, Jinsub Han <sup>2,3</sup>, Seung Jeong <sup>1</sup>, Jae Woon Lim <sup>1</sup>, Myung Chul Lee <sup>1</sup>, Hyunmok Son <sup>1</sup>, Hong Bae Kim <sup>1</sup>, Yun-Hoon Choung <sup>4</sup>, Hoon Seonwoo <sup>5,\*</sup>, Jong Hoon Chung <sup>2,3,6,\*</sup> and Kyoung-Je Jang <sup>7,8,\*</sup>

<sup>1</sup> Department of Biosystems & Biomaterials Science and Engineering, Seoul National University, Seoul 08826, Korea; sb92park@snu.ac.kr (S.P.); je6740@snu.ac.kr (J.E.K.); jsw3055@snu.ac.kr (S.J.); jwlim1130@snu.ac.kr (J.W.L.); josephmyungchul@gmail.com (M.C.L.); shmking@snu.ac.kr (H.S.); hbkim@snu.ac.kr (H.B.K.)

<sup>2</sup> Department of Biosystems Engineering, Seoul National University, Seoul 08826, Korea; rhineop@snu.ac.kr

<sup>3</sup> BK21 Global Smart Farm Educational Research Center, Seoul National University, Seoul 08826, Korea

<sup>4</sup> Department of Otolaryngology, Ajou University School of Medicine, Suwon 16499, Korea; yhc@ajou.ac.kr

<sup>5</sup> Department of Industrial Machinery Engineering, College of Life Sciences and Natural Resources, Suncheon National University, Suncheon 57922, Korea

<sup>6</sup> Research Institute of Agriculture and Life Sciences, Seoul National University, Seoul 08826, Korea

<sup>7</sup> Division of Agro-system Engineering, College of Agriculture and Life Science, Gyeongsang National University, Jinju 52828, Korea

<sup>8</sup> Institute of Agriculture & Life Science, Gyeongsang National University, Jinju 52828, Korea

<sup>†</sup> These two authors equally contributed to this study

\* Correspondence: uhun906@gmail.com (H.S.); jchung@snu.ac.kr (J.H.C.); kj\_jang@gnu.ac.kr (K.-J.J.); Tel.: +82-61-750-3261 (H.S.); +82-2-880-4601 (J.H.C.); +82-55-772-1898 (K.-J.J.)

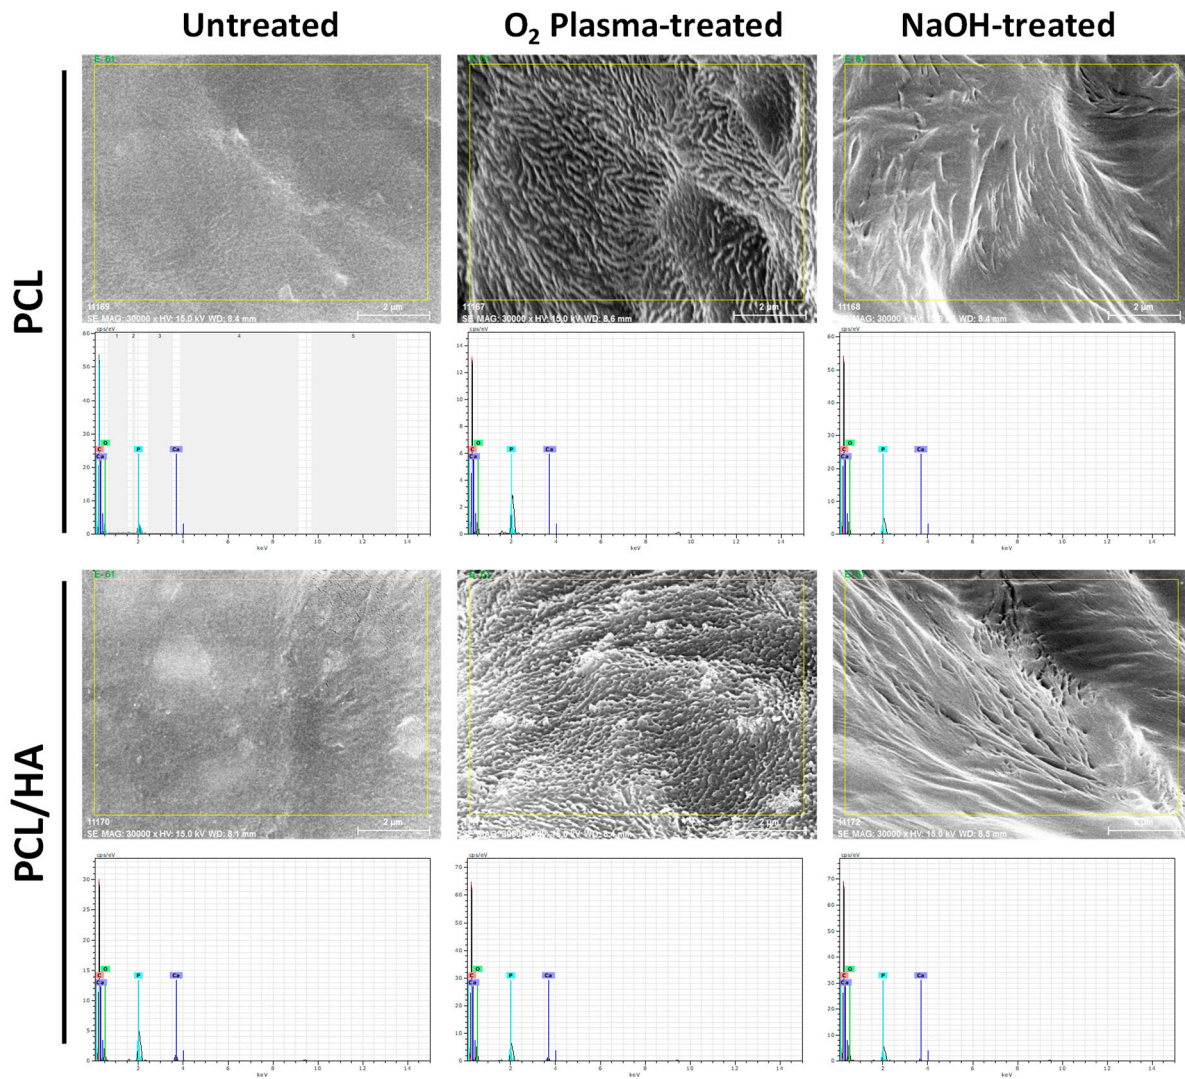

Figure S1. The EDS spectra of the PCL and PCL/HA scaffolds with different surface treatments.

Table S1. Elemental analysis of the scaffolds using EDS.

|        |                               | C (wt. %) | O (wt. %) | Ca (wt. %) | P (wt. %) | Total (%) |
|--------|-------------------------------|-----------|-----------|------------|-----------|-----------|
| PCL    | Untreated                     | 83.56     | 15.13     | 0.02       | 1.28      | 100       |
|        | O <sub>2</sub> Plasma-treated | 80.76     | 14.62     | 0          | 4.61      | 100       |
|        | NaOH-treated                  | 81.2      | 16.64     | 0          | 2.16      | 100       |
| PCL/HA | Untreated                     | 79.09     | 14.65     | 2.58       | 3.67      | 100       |
|        | O <sub>2</sub> Plasma-treated | 78.61     | 17.20     | 1.72       | 2.47      | 100       |
|        | NaOH-treated                  | 77.98     | 19.19     | 0.90       | 1.92      | 100       |

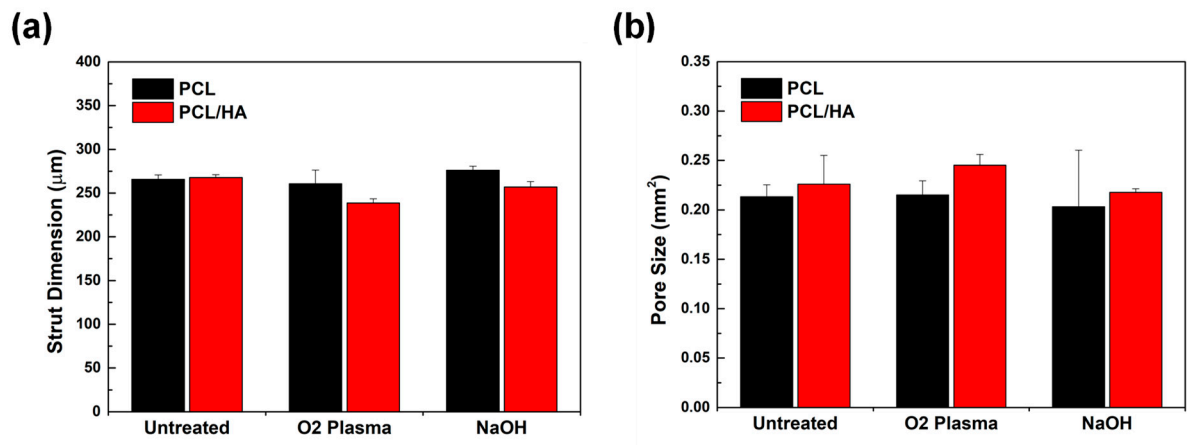

Figure S2. Strut and pore dimensions obtained for the different scaffolds.

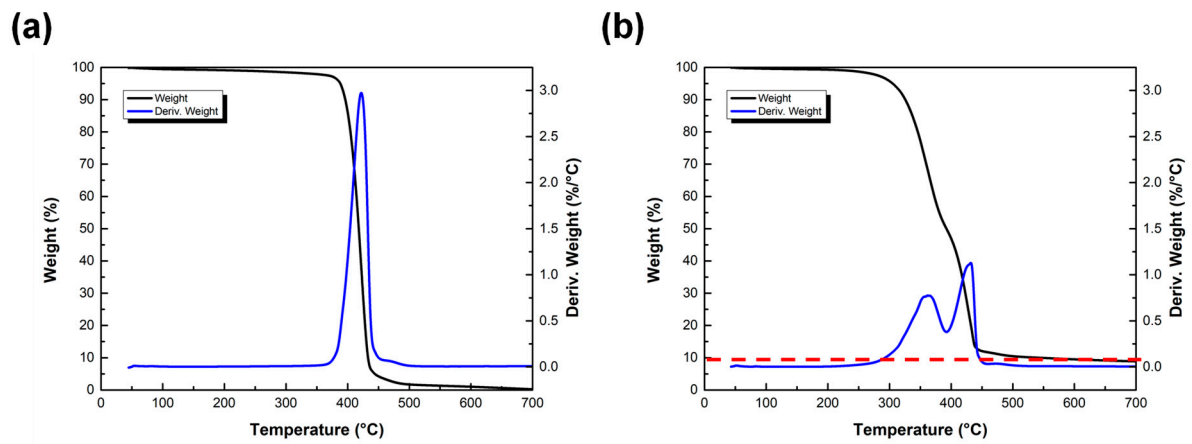

Figure S3. TGA curves of PCL and PCL/HA scaffolds.

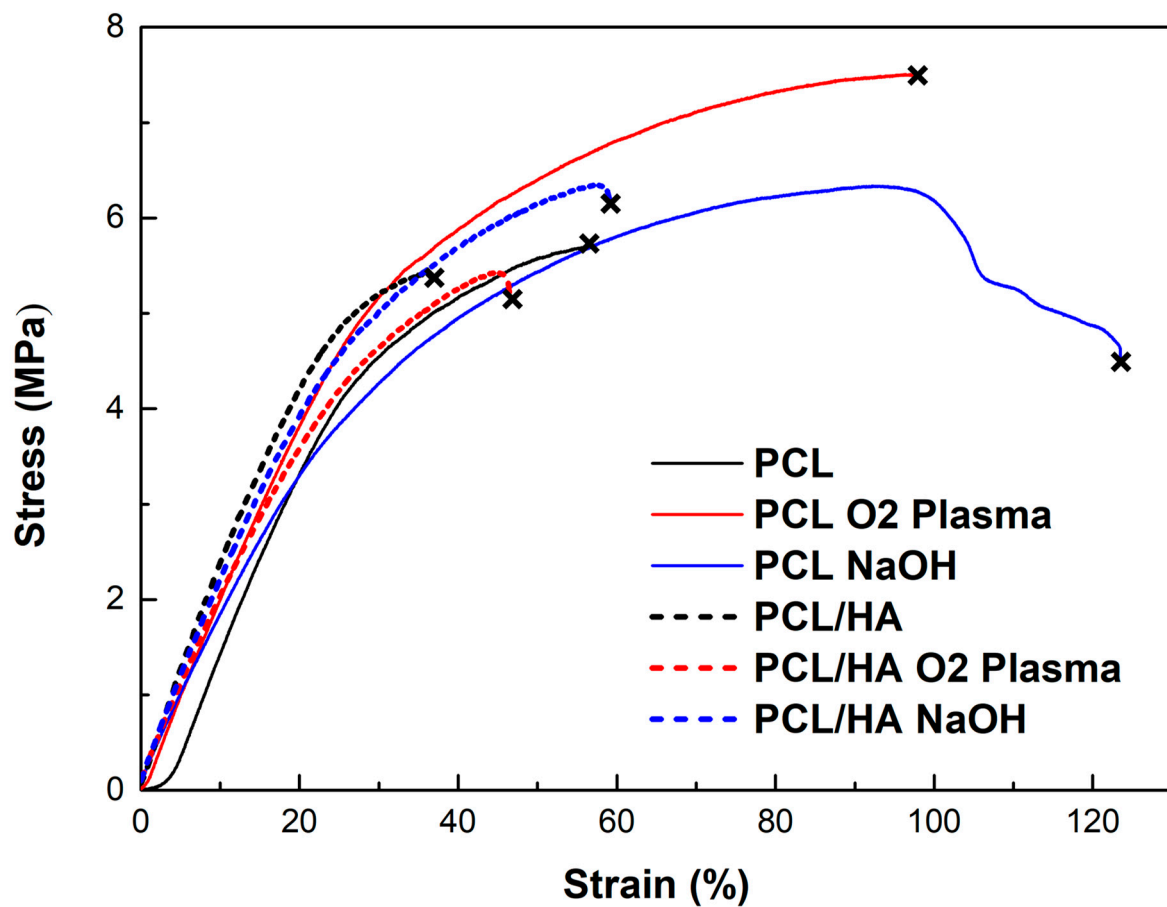

**Figure S4.** Stress-strain curves of PCL and PCL/HA scaffolds with different surface treatments. (x: Rupture Point, Black: untreated, Red: O<sub>2</sub> plasma-treated, and Blue: NaOH-treated).

**Table S2.** Mechanical properties of the scaffolds with different surface treatments.

|        |                               | Elastic Modulus (Mpa) | Tensile Strength (Mpa) | Strain (%)  |
|--------|-------------------------------|-----------------------|------------------------|-------------|
| PCL    | Untreated                     | 18.25±3.14            | 5.87±0.52              | 106.51±9.51 |
|        | O <sub>2</sub> Plasma-treated | 19.14±1.14            | 7.06±0.69              | 95.04±4.45  |
|        | NaOH-treated                  | 18.38±2.28            | 6.97±0.63              | 144.51±7.01 |
| PCL/HA | Untreated                     | 19.69±2.13            | 4.97±1.39              | 32.38±4.01  |
|        | O <sub>2</sub> Plasma-treated | 18.09±1.36            | 5.62±0.38              | 45.37±3.11  |
|        | NaOH-treated                  | 19.01±0.98            | 6.12±0.41              | 54.24±2.27  |
